# Supplementary material
Source: PubMed Central journal article supplement (PMC2824393)
Supplement: 0910449107_pnas.200910449SI.pdf [file 0910449107_pnas.200910449SI.pdf]

# Supporting Information

Hittinger et al. 10.1073/pnas.0910449107

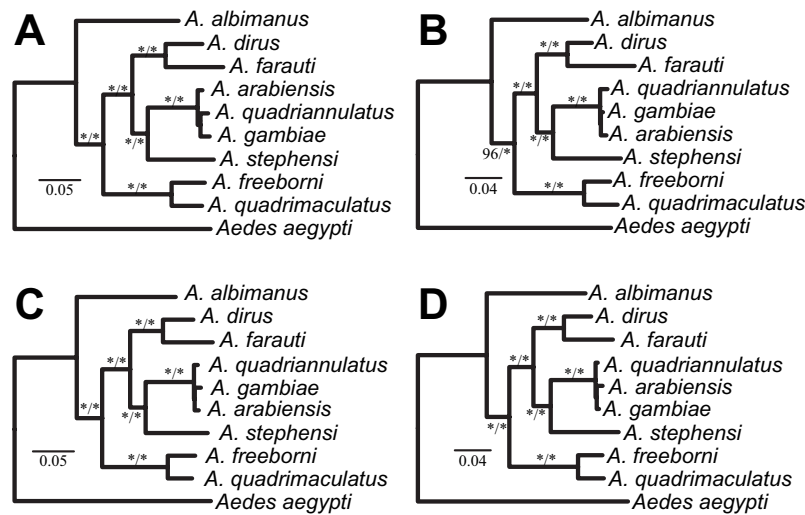

**Fig. S1.** Removal of loci of ambiguous orthology has no topological effect on phylogenetic inference from short-read next-generation DNA sequencing. (A) Maximum likelihood (ML) phylogeny produced from the data matrix constructed by considering all contigs  $\geq 100$  bp assembled from  $\sim 13$  million sequence reads per species using *A. aegypti* full transcripts as references under the single-contig strategy after exclusion of all loci in which *A. gambiae* contigs were inaccurately assigned to their *A. aegypti* reference transcript orthologs. (B) Same analysis as in A but on the data matrix constructed by considering all contigs  $\geq 300$  bp. (C) ML phylogeny produced from the data matrix constructed by considering all contigs  $\geq 100$  bp assembled from  $\sim 13$  million sequence reads per species using *A. aegypti* full transcripts as references under the single-contig strategy after exclusion of all loci that contained paralogs using a phylogeny-based assessment of orthology assignment. (D) Same analysis as in B but on the data matrix constructed by considering all contigs  $\geq 300$  bp. Clade support near internodes represents bootstrap support (ML) and posterior probability (Bayesian inference), respectively. Asterisks denote absolute support. Branch lengths represent estimated substitutions per site.

**Table S1. Species taxonomy and collection information**

| Species                                              | Strain   | Stock no. | Collection location             |
|------------------------------------------------------|----------|-----------|---------------------------------|
| <i>Anopheles albimanus</i> Wiedemann (Nyssorhynchus) | STECLA   | MRA-126   | Santa Tecla, El Salvador        |
| <i>Anopheles arabiensis</i> Patton (Cellia)          | KGB      | MRA-339   | Kanyemba, Zimbabwe              |
| <i>Anopheles dirus</i> Payton and Harrison (Cellia)  | WRAIR2   | MRA-700   | Thailand                        |
| <i>Anopheles farauti</i> Laveran (Cellia)            | FAR1     | MRA-489   | Rabaul Colony, Papua New Guinea |
| <i>Anopheles freeborni</i> Aitken (Anopheles)        | F1       | MRA-130   | Marysville, CA                  |
| <i>Anopheles gambiae</i> Giles (Cellia)              | SUA2LA   | MRA-765   | Suakoko, Liberia                |
| <i>Anopheles quadriannulatus</i> Theobald (Cellia)   | SKUQUA   | MRA-761   | Skukuze, South Africa           |
| <i>Anopheles quadrimaculatus</i> Say (Anopheles)     | ORLANDO  | MRA-139   | United States                   |
| <i>Anopheles stephensi</i> Liston (Cellia)           | STE2     | MRA-128   | Delhi, India                    |
| <i>Aedes (Stegomyia) aegypti</i> (Linnaeus)          | LVP-IB12 | MRA-735   | West Africa                     |

**Table S2. Summary statistics of assembled test contigs from 13 million Solexa/Illumina 36-bp sequence reads from all mosquito species**

| Species                   | Assembly statistics |      |       |          |                | ≥100-bp test contig set |        |               |                 | ≥300-bp test contig set |        |               |                 |    |
|---------------------------|---------------------|------|-------|----------|----------------|-------------------------|--------|---------------|-----------------|-------------------------|--------|---------------|-----------------|----|
|                           | Read no.            | ABQS | k-mer | Node no. | Maximum length | Contig no.              | Amount | Median length | Median coverage | Contig no.              | Amount | Median length | Median coverage |    |
| <i>A. albimanus</i>       | 13,741,955          | 32   | 23    | 89,735   | 87             | 2,041                   | 10,738 | 1,983,006     | 142             | 7                       | 1,143  | 528,330       | 403             | 16 |
| <i>A. arabiensis</i>      | 12,180,498          | 36   | 21    | 161,248  | 74             | 1,987                   | 19,172 | 3,139,670     | 133             | 6                       | 1,241  | 534,257       | 379             | 14 |
| <i>A. dirus</i>           | 14,659,921          | 34   | 23    | 101,182  | 89             | 1,952                   | 14,162 | 2,575,380     | 141             | 7                       | 1,444  | 661,028       | 399             | 16 |
| <i>A. farauti</i>         | 12,114,242          | 34   | 23    | 97,831   | 82             | 1,152                   | 15,457 | 2,587,562     | 136             | 6                       | 1,090  | 467,309       | 389             | 14 |
| <i>A. freeborni</i>       | 14,107,744          | 33   | 21    | 173,715  | 81             | 1,863                   | 21,828 | 3,857,785     | 140             | 6                       | 2,011  | 873,651       | 384             | 12 |
| <i>A. gambiae</i>         | 12,101,924          | 28   | 23    | 160,346  | 81             | 1,529                   | 20,364 | 3,331,879     | 134             | 6                       | 1,246  | 534,880       | 377             | 16 |
| <i>A. quadriannulatus</i> | 13,079,694          | 36   | 23    | 100,959  | 78             | 2,590                   | 14,207 | 2,377,237     | 131             | 6                       | 1,006  | 473,416       | 399             | 16 |
| <i>A. quadrimaculatus</i> | 13,803,823          | 34   | 21    | 169,661  | 81             | 1,635                   | 24,152 | 4,085,079     | 137             | 6                       | 1,729  | 759,914       | 383             | 12 |
| <i>A. stephensi</i>       | 13,547,996          | 36   | 21    | 160,555  | 79             | 1,903                   | 17,660 | 3,092,149     | 138             | 6                       | 1,504  | 677,568       | 390             | 12 |
| <i>A. aegypti</i>         | 11,465,769          | 37   | 21    | 91,591   | 81             | 1,430                   | 15,712 | 2,727,917     | 137             | 5                       | 1,327  | 592,760       | 385             | 12 |

"Read no.," no. of Solexa sequence reads used as input in the assembly; "ABQS," average base quality score in a Solexa sequence read; "k-mer," required length of identical match between two sequence reads by the VELVET software (1); "Node," number of raw contigs produced by the VELVET software; "N50," the length-weighted average of contig length, such that the average base in the assembly will appear in a contig of N50 length or greater; "Maximum length," length of longest contig in the assembly; "Amount," amount of sequence found in contigs ≥100/300 bp; "Median length," median length of contigs ≥100/300 bp; "Median coverage," median coverage depth of contigs ≥100/300 bp. The data for *A. gambiae* and *A. aegypti* are from Gibbons et al. (2).

- Zerbino DR (2008) Birney E (2008) Velvet: Algorithms for de novo short read assembly using de Bruijn graphs. *Genome Res* 18:821–829.
- Gibbons JG, et al. (2009) Benchmarking next-generation transcriptome sequencing for functional and evolutionary genomics. *Mol Biol Evol* 26:2731–2744.

**Table S3. Quantity, putative ortholog detection, and accuracy summary statistics for data matrices constructed from ≥100 and ≥300 bp contigs using the single-contig strategy**

| Data set                                       | Total alignment length | Overlapping alignment length | Data matrices constructed from ≥100-bp contigs |                  |                       |             |
|------------------------------------------------|------------------------|------------------------------|------------------------------------------------|------------------|-----------------------|-------------|
|                                                |                        |                              | Missing data, %                                | No. of orthologs | No. of true orthologs | Accuracy, % |
| 100,000                                        | NA                     | NA                           | NA                                             | 0                | NA                    | NA          |
| 250,000                                        | 342                    | 1                            | 41                                             | 1                | 0                     | 0           |
| 500,000                                        | 3,588                  | 100                          | 47                                             | 11               | 10                    | 91          |
| 1,000,000                                      | 30,462                 | 1,744                        | 44                                             | 72               | 69                    | 96          |
| 2,000,000                                      | 57,864                 | 6,004                        | 38                                             | 120              | 113                   | 94          |
| 3,000,000                                      | 90,705                 | 10,718                       | 40                                             | 173              | 161                   | 93          |
| 4,000,000                                      | 119,316                | 12,556                       | 42                                             | 212              | 197                   | 93          |
| 5,000,000                                      | 148,653                | 13,873                       | 44                                             | 252              | 235                   | 93          |
| ~6,500,000                                     | 214,905                | 15,030                       | 46                                             | 333              | 311                   | 93          |
| ~13,000,000                                    | 389,364                | 15,239                       | 51                                             | 553              | 526                   | 95          |
| Data matrices constructed from ≥300-bp contigs |                        |                              |                                                |                  |                       |             |
| 100,000                                        | NA                     | NA                           | NA                                             | 0                | NA                    | NA          |
| 250,000                                        | NA                     | NA                           | NA                                             | 0                | NA                    | NA          |
| 500,000                                        | NA                     | NA                           | NA                                             | 0                | NA                    | NA          |
| 1,000,000                                      | NA                     | NA                           | NA                                             | 0                | NA                    | NA          |
| 2,000,000                                      | 4,896                  | 792                          | 37                                             | 8                | 6                     | 75          |
| 3,000,000                                      | 17,037                 | 3,576                        | 28                                             | 29               | 27                    | 93          |
| 4,000,000                                      | 22,926                 | 4,493                        | 26                                             | 36               | 33                    | 92          |
| 5,000,000                                      | 27,966                 | 5,295                        | 28                                             | 40               | 38                    | 95          |
| ~6,500,000                                     | 33,465                 | 4,091                        | 34                                             | 37               | 36                    | 97          |
| ~13,000,000                                    | 72,564                 | 5,518                        | 44                                             | 69               | 68                    | 99          |

"Data set," no. of 36-bp sequence reads used as input in the assembly; "Total alignment length," total length of alignment in data matrix; "Overlapping alignment length," total length of alignment after excluding all alignment columns with data missing or gaps; "Missing data, %," percentage of missing data in the alignment; "No. of orthologs," no. of putative orthologs identified across all 10 species; "No. of true orthologs," no. of true orthologs in alignment; "Accuracy, %," percentage of orthologs detected accurately in alignment. Note that placements whose accuracy could not be confirmed include both real errors and possible reference transcriptome annotation errors, which makes our accuracy assessment conservative.

**Table S4. Clade support values for phylogenetic analyses of phylogenomic data matrices constructed from varying amounts of starting sequence data using the single-contig strategy**

| Clade                                                                                         | Clade support values for ML analysis of data matrices constructed from $\geq 100$ -bp contigs |                   |                 |                 |                 |                 |                 |                 |                        |                       |
|-----------------------------------------------------------------------------------------------|-----------------------------------------------------------------------------------------------|-------------------|-----------------|-----------------|-----------------|-----------------|-----------------|-----------------|------------------------|-----------------------|
| (Agam, Aara, Aqan)                                                                            | NA                                                                                            | 99                | 100             | 100             | 100             | 100             | 100             | 100             | 100                    | 100                   |
| (Agam, Aara, Aqan, Aste)                                                                      | NA                                                                                            | 4                 | 18              | 0               | 100             | 100             | 100             | 100             | 100                    | 100                   |
| (Adir, Afar)                                                                                  | NA                                                                                            | 66                | 100             | 100             | 100             | 100             | 100             | 100             | 100                    | 100                   |
| (Agam, Aara, Aqan, Aste, Adir, Afar)                                                          | NA                                                                                            | 28                | 100             | 100             | 100             | 100             | 100             | 100             | 100                    | 100                   |
| (Afre, Aqma)                                                                                  | NA                                                                                            | 71                | 100             | 100             | 100             | 100             | 100             | 100             | 100                    | 100                   |
| (Agam, Aara, Aqan, Aste, Adir, Afar, Afre, Aqma)                                              | NA                                                                                            | 19                | 0               | 100             | 100             | 100             | 100             | 100             | 100                    | 100                   |
| Clade support values for BI analysis of data matrices constructed from $\geq 100$ -bp contigs |                                                                                               |                   |                 |                 |                 |                 |                 |                 |                        |                       |
| (Agam, Aara, Aqan)                                                                            | NA                                                                                            | 69                | 100             | 100             | 100             | 100             | 100             | 100             | 100                    | 100                   |
| (Agam, Aara, Aqan, Aste)                                                                      | NA                                                                                            | 7                 | 6               | 0               | 100             | 100             | 100             | 100             | 100                    | 100                   |
| (Adir, Afar)                                                                                  | NA                                                                                            | 88                | 100             | 100             | 100             | 100             | 100             | 100             | 100                    | 100                   |
| (Agam, Aara, Aqan, Aste, Adir, Afar)                                                          | NA                                                                                            | 0                 | 100             | 100             | 100             | 100             | 100             | 100             | 100                    | 100                   |
| (Afre, Aqma)                                                                                  | NA                                                                                            | 79                | 100             | 100             | 100             | 100             | 100             | 100             | 100                    | 100                   |
| (Agam, Aara, Aqan, Aste, Adir, Afar, Afre, Aqma)                                              | NA                                                                                            | 0                 | 10              | 100             | 100             | 100             | 100             | 100             | 100                    | 100                   |
| Clade support values for ML analysis of data matrices constructed from $\geq 300$ -bp contigs |                                                                                               |                   |                 |                 |                 |                 |                 |                 |                        |                       |
| (Agam, Aara, Aqan)                                                                            | NA                                                                                            | NA                | NA              | NA              | 100             | 100             | 100             | 100             | 100                    | 100                   |
| (Agam, Aara, Aqan, Aste)                                                                      | NA                                                                                            | NA                | NA              | NA              | 0               | 100             | 100             | 100             | 100                    | 100                   |
| (Adir, Afar)                                                                                  | NA                                                                                            | NA                | NA              | NA              | 100             | 100             | 100             | 100             | 100                    | 100                   |
| (Agam, Aara, Aqan, Aste, Adir, Afar)                                                          | NA                                                                                            | NA                | NA              | NA              | 0               | 100             | 100             | 100             | 100                    | 100                   |
| (Afre, Aqma)                                                                                  | NA                                                                                            | NA                | NA              | NA              | 0               | 100             | 100             | 100             | 100                    | 100                   |
| (Agam, Aara, Aqan, Aste, Adir, Afar, Afre, Aqma)                                              | NA                                                                                            | NA                | NA              | NA              | 13              | 68              | 86              | 100             | 100                    | 100                   |
| Clade support values for BI analysis of data matrices constructed from $\geq 300$ -bp contigs |                                                                                               |                   |                 |                 |                 |                 |                 |                 |                        |                       |
| (Agam, Aara, Aqan)                                                                            | NA                                                                                            | NA                | NA              | NA              | 100             | 100             | 100             | 100             | 100                    | 100                   |
| (Agam, Aara, Aqan, Aste)                                                                      | NA                                                                                            | NA                | NA              | NA              | 0               | 100             | 100             | 100             | 100                    | 100                   |
| (Adir, Afar)                                                                                  | NA                                                                                            | NA                | NA              | NA              | 100             | 100             | 100             | 100             | 100                    | 100                   |
| (Agam, Aara, Aqan, Aste, Adir, Afar)                                                          | NA                                                                                            | NA                | NA              | NA              | 0               | 100             | 100             | 100             | 100                    | 100                   |
| (Afre, Aqma)                                                                                  | NA                                                                                            | NA                | NA              | NA              | 0               | 100             | 100             | 100             | 100                    | 100                   |
| (Agam, Aara, Aqan, Aste, Adir, Afar, Afre, Aqma)                                              | NA                                                                                            | NA                | NA              | NA              | 11              | 11              | 100             | 100             | 100                    | 100                   |
| No. of 36-bp sequence reads used in assembly                                                  | $1 \times 10^5$                                                                               | $2.5 \times 10^5$ | $5 \times 10^5$ | $1 \times 10^6$ | $2 \times 10^6$ | $3 \times 10^6$ | $4 \times 10^6$ | $5 \times 10^6$ | $\sim 6.5 \times 10^6$ | $\sim 13 \times 10^6$ |
| Length of data matrix constructed from $\geq 100$ -bp contigs                                 | NA                                                                                            | 342               | 3,588           | 30,462          | 57,864          | 90,705          | 119,316         | 148,653         | 214,905                | 389,364               |
| Length of data matrix constructed from $\geq 300$ -bp contigs                                 | NA                                                                                            | NA                | NA              | NA              | 4,896           | 17,037          | 22,926          | 27,966          | 33,465                 | 72,564                |

**Table S5. Quantity, putative ortholog contig detection, and accuracy summary statistics for data matrices constructed from  $\geq 100$ - and  $\geq 300$ -bp contigs using the supercontig strategy**

| Data set                                              | No. of orthologs | No. of contigs | Total alignment length | Data matrices constructed from $\geq 100$ -bp contigs |                 |                     |             |
|-------------------------------------------------------|------------------|----------------|------------------------|-------------------------------------------------------|-----------------|---------------------|-------------|
|                                                       |                  |                |                        | Overlapping alignment length                          | Missing data, % | No. of true contigs | Accuracy, % |
| 100,000                                               | 4                | 3              | 459                    | 0                                                     | 49              | 1                   | 33          |
| 250,000                                               | 50               | 34             | 6,141                  | 0                                                     | 52              | 27                  | 79          |
| 500,000                                               | 124              | 128            | 26,625                 | 285                                                   | 45              | 110                 | 86          |
| 1,000,000                                             | 226              | 287            | 60,135                 | 4,188                                                 | 36              | 245                 | 85          |
| 2,000,000                                             | 430              | 550            | 122,358                | 16,563                                                | 34              | 460                 | 84          |
| 3,000,000                                             | 630              | 825            | 188,784                | 28,548                                                | 35              | 680                 | 82          |
| 4,000,000                                             | 850              | 1,152          | 260,844                | 36,684                                                | 35              | 945                 | 82          |
| 5,000,000                                             | 1,054            | 1,449          | 332,871                | 43,164                                                | 36              | 1,202               | 83          |
| ~6,500,000                                            | 1,591            | 1,872          | 521,352                | 57,441                                                | 37              | 1,569               | 84          |
| ~13,000,000                                           | 2,661            | 4,118          | 970,746                | 82,650                                                | 38              | 3,496               | 85          |
| Data matrices constructed from $\geq 300$ -bp contigs |                  |                |                        |                                                       |                 |                     |             |
| 100,000                                               | 0                | 0              | NA                     | NA                                                    | NA              | 0                   | NA          |
| 250,000                                               | 2                | 2              | 630                    | 0                                                     | 49              | 1                   | 50          |
| 500,000                                               | 10               | 6              | 2,433                  | 0                                                     | 47              | 4                   | 67          |
| 1,000,000                                             | 64               | 36             | 17,850                 | 0                                                     | 48              | 31                  | 86          |
| 2,000,000                                             | 148              | 86             | 53,169                 | 876                                                   | 40              | 74                  | 86          |
| 3,000,000                                             | 198              | 146            | 76,398                 | 3,957                                                 | 37              | 128                 | 88          |
| 4,000,000                                             | 255              | 183            | 100,476                | 5,832                                                 | 37              | 159                 | 87          |
| 5,000,000                                             | 302              | 222            | 124,512                | 6,867                                                 | 37              | 190                 | 86          |
| ~6,500,000                                            | 445              | 290            | 190,155                | 7,413                                                 | 39              | 251                 | 87          |
| ~13,000,000                                           | 725              | 523            | 345,312                | 10,227                                                | 42              | 451                 | 86          |

"Data set," no. of 36-bp sequence reads used as input in the assembly; "No. of orthologs," no. of putative ortholog supercontigs identified; "No. of contigs," no. of putative ortholog contigs identified; "Total alignment length," total length of alignment in data matrix; "Overlapping alignment length," total length of alignment after excluding all alignment columns with data missing or gaps; "Missing data, %," percentage of missing data in the alignment; "No. of true contigs," no. of true ortholog contigs in alignment; "Accuracy, %," percentage of ortholog contigs detected accurately in alignment. Note that placements whose accuracy could not be confirmed include both real errors and possible reference transcriptome annotation errors, which makes our accuracy assessment conservative.

**Table S6. Clade support values for phylogenetic analyses of phylogenomic data matrices constructed from varying amounts of starting sequence data using the supercontig strategy**

| Clade                                                                                         | Clade support values for ML analysis of data matrices constructed from $\geq 100$ -bp contigs |                   |                 |                 |                 |                 |                 |                 |                        |                       |
|-----------------------------------------------------------------------------------------------|-----------------------------------------------------------------------------------------------|-------------------|-----------------|-----------------|-----------------|-----------------|-----------------|-----------------|------------------------|-----------------------|
| (Agam, Aara, Aqan)                                                                            | 67                                                                                            | 100               | 100             | 100             | 100             | 100             | 100             | 100             | 100                    | 100                   |
| (Agam, Aara, Aqan, Aste)                                                                      | 57                                                                                            | 46                | 97              | 100             | 100             | 100             | 100             | 100             | 100                    | 100                   |
| (Adir, Afar)                                                                                  | 0                                                                                             | 29                | 100             | 100             | 100             | 100             | 100             | 100             | 100                    | 100                   |
| (Agam, Aara, Aqan, Aste, Adir, Afar)                                                          | 0                                                                                             | 26                | 100             | 100             | 100             | 100             | 100             | 100             | 100                    | 100                   |
| (Afre, Aqma)                                                                                  | 2                                                                                             | 100               | 100             | 100             | 100             | 100             | 100             | 100             | 100                    | 100                   |
| (Agam, Aara, Aqan, Aste, Adir, Afar, Afre, Aqma)                                              | 32                                                                                            | 11                | 100             | 100             | 100             | 100             | 100             | 100             | 100                    | 100                   |
| Clade support values for BI analysis of data matrices constructed from $\geq 100$ -bp contigs |                                                                                               |                   |                 |                 |                 |                 |                 |                 |                        |                       |
| (Agam, Aara, Aqan)                                                                            | 90                                                                                            | 100               | 100             | 100             | 100             | 100             | 100             | 100             | 100                    | 100                   |
| (Agam, Aara, Aqan, Aste)                                                                      | 0                                                                                             | 97                | 100             | 100             | 100             | 100             | 100             | 100             | 100                    | 100                   |
| (Adir, Afar)                                                                                  | 0                                                                                             | 100               | 100             | 100             | 100             | 100             | 100             | 100             | 100                    | 100                   |
| (Agam, Aara, Aqan, Aste, Adir, Afar)                                                          | 0                                                                                             | 100               | 100             | 100             | 100             | 100             | 100             | 100             | 100                    | 100                   |
| (Afre, Aqma)                                                                                  | 0                                                                                             | 100               | 100             | 100             | 100             | 100             | 100             | 100             | 100                    | 100                   |
| (Agam, Aara, Aqan, Aste, Adir, Afar, Afre, Aqma)                                              | 0                                                                                             | 12                | 100             | 100             | 100             | 100             | 100             | 100             | 100                    | 100                   |
| Clade support values for ML analysis of data matrices constructed from $\geq 300$ -bp contigs |                                                                                               |                   |                 |                 |                 |                 |                 |                 |                        |                       |
| (Agam, Aara, Aqan)                                                                            | NA                                                                                            | 13                | 82              | 100             | 100             | 100             | 100             | 100             | 100                    | 100                   |
| (Agam, Aara, Aqan, Aste)                                                                      | NA                                                                                            | 6                 | 45              | 77              | 100             | 100             | 100             | 100             | 100                    | 100                   |
| (Adir, Afar)                                                                                  | NA                                                                                            | 0                 | 22              | 100             | 100             | 100             | 100             | 100             | 100                    | 100                   |
| (Agam, Aara, Aqan, Aste, Adir, Afar)                                                          | NA                                                                                            | 3                 | 0               | 100             | 100             | 100             | 100             | 100             | 100                    | 100                   |
| (Afre, Aqma)                                                                                  | NA                                                                                            | 0                 | 100             | 100             | 100             | 100             | 100             | 100             | 100                    | 100                   |
| (Agam, Aara, Aqan, Aste, Adir, Afar, Afre, Aqma)                                              | NA                                                                                            | 7                 | 0               | 41              | 100             | 100             | 100             | 100             | 100                    | 100                   |
| Clade support values for BI analysis of data matrices constructed from $\geq 300$ -bp contigs |                                                                                               |                   |                 |                 |                 |                 |                 |                 |                        |                       |
| (Agam, Aara, Aqan)                                                                            | NA                                                                                            | 47                | 100             | 100             | 100             | 100             | 100             | 100             | 100                    | 100                   |
| (Agam, Aara, Aqan, Aste)                                                                      | NA                                                                                            | 11                | 0               | 5               | 100             | 100             | 100             | 100             | 100                    | 100                   |
| (Adir, Afar)                                                                                  | NA                                                                                            | 0                 | 100             | 100             | 100             | 100             | 100             | 100             | 100                    | 100                   |
| (Agam, Aara, Aqan, Aste, Adir, Afar)                                                          | NA                                                                                            | 93                | 100             | 100             | 100             | 100             | 100             | 100             | 100                    | 100                   |
| (Afre, Aqma)                                                                                  | NA                                                                                            | 16                | 100             | 100             | 100             | 100             | 100             | 100             | 100                    | 100                   |
| (Agam, Aara, Aqan, Aste, Adir, Afar, Afre, Aqma)                                              | NA                                                                                            | 25                | 25              | 33              | 100             | 100             | 100             | 100             | 100                    | 100                   |
| No. of 36-bp sequence reads used in assembly                                                  | $1 \times 10^5$                                                                               | $2.5 \times 10^5$ | $5 \times 10^5$ | $1 \times 10^6$ | $2 \times 10^6$ | $3 \times 10^6$ | $4 \times 10^6$ | $5 \times 10^6$ | $\sim 6.5 \times 10^6$ | $\sim 13 \times 10^6$ |
| Length of data matrix constructed from $\geq 100$ bp contigs                                  | 459                                                                                           | 6,141             | 26,625          | 60,135          | 122,358         | 188,784         | 260,844         | 332,871         | 521,352                | 970,746               |
| Length of data matrix constructed from $\geq 300$ -bp contigs                                 | NA                                                                                            | 630               | 2,433           | 17,850          | 53,169          | 76,398          | 100,476         | 124,512         | 190,155                | 345,312               |
